# Supplementary material
Source: PubMed Central journal article supplement (PMC3974616)
Supplement: NIHMS557269-supplement-01.pdf [file NIHMS557269-supplement-01.pdf]

**Supplemental Table 1.** Demographic and Clinical Characteristics in children with ADHD by exposure severe maternal stress during pregnancy

|                                             | Exposed with maternal stress | No exposed with maternal stress | <i>p</i> |
|---------------------------------------------|------------------------------|---------------------------------|----------|
| N                                           | 19                           | 55                              |          |
| Mean Age (SD)                               | 11.47 (2.58)                 | 11.92 (2.66)                    | 0.52     |
| Gender (% male)                             | 15 (21.1)                    | 44 (80.0)                       | 0.92     |
| Race (% Caucasian)                          | 18 (94.7)                    | 51 (92.7)                       | 0.76     |
| Socioeconomic Status <sup>a</sup> (SD)      | 46.77 (12.06)                | 48.17 (11.05)                   | 0.60     |
| Maternal level of education(SD)             | 5.17 (1.24)                  | 5.40 (1.32)                     | 0.55     |
| Paternal level of education (SD)            | 5.35 (1.01)                  | 5.55 (1.27)                     | 0.42     |
| Low birth weight <sup>b</sup> (N, %)        | 2 (10.5)                     | 2 (3.6)                         | 0.25     |
| IQ Estimate (SD)                            | 116.18 (15.71)               | 109.50 (16.61)                  | 0.25     |
| ADHD (N, %)                                 |                              |                                 |          |
| Combined type                               | 14 (73.7)                    | 38 (69.1)                       | 0.70     |
| Hyperactive-Impulsive type                  | 1 (5.3)                      | 1 (1.8)                         | 0.42     |
| Inattentive type                            | 4 (21.1)                     | 16 (29.1)                       | 0.49     |
| Total ADHD severity score <sup>c</sup> (SD) | 28.50 (10.90)                | 28.83 (9.98)                    | 0.90     |
| Inattentive score                           | 14.94 (5.67)                 | 16.83 (5.91)                    | 0.24     |
| Hyperactivity score                         | 13.56 (6.44)                 | 12.00 (5.92)                    | 0.35     |
| Medication Status <sup>d</sup> (N, %)       |                              |                                 |          |
| Psychostimulants                            | 8 (66.6)                     | 20 (28.9)                       | 0.65     |
| Other psychotropic medications              | 8 (66.6)                     | 22 (31.8)                       | 0.87     |
| Comorbid diagnoses <sup>e</sup> (N, %)      |                              |                                 |          |
| Tourette Syndrome                           | 7 (36.8)                     | 28 (50.9)                       | 0.29     |
| OCD                                         | 2 (10.5)                     | 15 (27.3)                       | 0.13     |
| Oppositional Defiant                        | 3 (15.8)                     | 19 (34.5)                       | 0.12     |
| Depression                                  | 5 (26.3)                     | 14 (25.45)                      | 0.35     |
| Anxiety Disorder (except OCD)               | 3 (15.8)                     | 9 (16.4)                        | 0.93     |

Note: ADHD = attention-deficit/hyperactivity disorder; OCD = obsessive compulsive disorder; Severe psychosocial stress = >4 ordinal Level of Stress Severity scale (1-5 ordinal scale, Leckman et al., 1990)

<sup>a</sup>Measured with the Hollingshead Four-Factor Index of Social Status (Hollingshead, 1975)

<sup>b</sup>Low birth weight = birth weight <2500 g

<sup>c</sup>Based on the Du Paul's Parent and teacher ratings of ADHD symptoms. The presented scores are the current ADHD symptom severity at the time of interview.

<sup>d</sup>Included stimulants (N = 32), alpha<sub>2</sub> agonists (N = 13), selective serotonin reuptake inhibitors (N = 9), antipsychotics (N = 7), mood stabilizers (N = 2), and tricyclic antidepressants (N = 1).

<sup>e</sup>Lifetime diagnosis based on structured interview and available data.

**Supplemental Table 2.** Neuropsychological performance of children with Attention Deficit Hyperactivity Disorder (ADHD) with and without exposure to severe maternal stress during pregnancy

|                                | Exposed with maternal stress | No exposed with maternal stress | <i>F</i> | <i>p</i> |
|--------------------------------|------------------------------|---------------------------------|----------|----------|
|                                | <i>Mean (SD)</i>             | <i>Mean (SD)</i>                |          |          |
| <i>Connors CPT<sup>a</sup></i> |                              |                                 |          |          |
| Errors of omission (%)         | 4.36 (2.51)                  | 7.39 (7.01)                     | 3.89     | 0.052    |
| Errors of commission (%)       | 57.89 (22.11)                | 58.33 (20.05)                   | 0.09     | 0.75     |
| Reaction time (ms)             | 447.16 (101.04)              | 435.00 (109.86)                 | 0.04     | 0.84     |
| RT variability (SE)            | 15.86 (11.22)                | 17.25 (11.08)                   | 0.95     | 0.33     |
| <i>Stroop<sup>b</sup></i>      |                              |                                 |          |          |
| Golden Interference Score      | 186.73 (68.59)               | 178.57 (75.40)                  | 0.085    | 0.77     |
| <i>VMI<sup>c</sup></i>         |                              |                                 |          |          |
| Beery Standard score           | 94.67 (15.01)                | 90.41 (15.26)                   | 0.059    | 0.81     |
| <i>Purdue<sup>d</sup></i>      |                              |                                 |          |          |
| Dominant raw score             | 13.73 (1.86)                 | 13.21 (1.87)                    | 2.14     | 0.14     |
| Nondominant raw score          | 12.21 (1.98)                 | 12.34 (2.06)                    | 0.01     | 0.89     |
| Bimanual raw score             | 10.01 (1.48)                 | 10.25 (1.84)                    | 0.13     | 0.71     |

Note: Severe psychosocial stress = >4 ordinal Level of Stress Severity scale (1-5 ordinal scale, Leckman et al., 1990)

CPT=Continuous Performance Test; RT=reaction time; SE=standard error; VMI=Beery Visual Motor Integration Test.

<sup>a</sup>Child age was the significant covariate for the errors of omission ( $F = 15.94, P < 0.001$ ); reaction time ( $F = 9.32, P = 0.003$ ); and reaction time variability ( $F = 8.57, P = 0.005$ ).

<sup>b</sup>Child age was the significant covariate ( $F = 27.94, P < 0.001$ ).

<sup>c</sup>Child IQ remained in the model as the significant covariate ( $F = 0.81, P < 0.001$ ).

<sup>d</sup>Child age was the significant covariate for dominant raw score ( $F = 17.43, P < 0.001$ ); nondominant raw score ( $F = 33.04, P < 0.001$ ).
